# Supplementary material
Source: ML conference proceedings conference paper supplement (https://openreview.net/forum?id=WaAcjKtNqnM)

## A GRADIENTS BETWEEN POLICY IMPROVEMENT AND POLICY EVALUATION

**Theorem 1** (Sutton et al. (1999)). *If  $Q_\theta$  satisfies  $\mathbb{E}_\pi[(Q^\pi - Q_\theta)\nabla_\theta Q_\theta] = 0$  and  $\nabla_\theta Q_\theta = \nabla_\theta \log \pi_\theta$ , then we have*

$$\nabla_\theta \mathcal{J} = \mathbb{E}_\pi[Q_\theta \nabla_\theta \log \pi_\theta].$$

|           | Function Approximation                                                                                                                          | Train Gradients                                   | Interested Angles                                                                                                                                                                               |
|-----------|-------------------------------------------------------------------------------------------------------------------------------------------------|---------------------------------------------------|-------------------------------------------------------------------------------------------------------------------------------------------------------------------------------------------------|
| PPO       | $(V, \text{logit}) = (V_\theta, \text{logit}_\theta)$<br>$\pi = \text{softmax}(\text{logit})$                                                   | $0.5\nabla L_V + \nabla \mathcal{J}$              | $\langle \nabla L_V, \nabla \mathcal{J} \rangle$                                                                                                                                                |
| PPO ver.1 | $(Q, \text{logit}) = (Q_\theta, \text{logit}_\theta)$ ,<br>$\pi = \text{softmax}(\text{logit})$<br>$V = \text{sg}(\pi) \cdot Q$                 | $0.5\nabla L_V + \nabla \mathcal{J}$              | $\langle \nabla L_V, \nabla \mathcal{J} \rangle$<br>$\langle \nabla L_Q, \nabla \mathcal{J} \rangle$<br>$\langle \nabla L_V, \nabla L_Q \rangle$<br>$\langle \nabla Q, \nabla \log \pi \rangle$ |
| PPO ver.2 | $(Q, \text{logit}) = (Q_\theta, \text{logit}_\theta)$ ,<br>$\pi = \text{softmax}(\text{logit})$<br>$V = \text{sg}(\pi) \cdot Q$                 | $0.5\nabla L_V + \nabla L_Q + \nabla \mathcal{J}$ | $\langle \nabla L_V, \nabla \mathcal{J} \rangle$<br>$\langle \nabla L_Q, \nabla \mathcal{J} \rangle$<br>$\langle \nabla L_V, \nabla L_Q \rangle$<br>$\langle \nabla Q, \nabla \log \pi \rangle$ |
| PPO+CASA  | $(V, A) = (V_\theta, A_\theta)$ ,<br>$\pi = \text{softmax}(A/\tau)$ ,<br>$\bar{A} = A - \text{sg}(\pi) \cdot A$<br>$Q = \bar{A} + \text{sg}(V)$ | $0.5\nabla L_V + \nabla L_Q + \nabla \mathcal{J}$ | $\langle \nabla L_V, \nabla \mathcal{J} \rangle$<br>$\langle \nabla L_Q, \nabla \mathcal{J} \rangle$<br>$\langle \nabla L_V, \nabla L_Q \rangle$<br>$\langle \nabla Q, \nabla \log \pi \rangle$ |

Table 5: PPO is the original PPO. PPO ver.1 and PPO ver.2 are adapted versions to calculate  $\nabla L_Q$ . PPO+CASA is applying CASA on PPO, which is described in Sec. 4.2

|            | Function Approximation                                                                                                                          | Train Gradients                                   | Interested Angles                                                                                                                                |
|------------|-------------------------------------------------------------------------------------------------------------------------------------------------|---------------------------------------------------|--------------------------------------------------------------------------------------------------------------------------------------------------|
| R2D2       | $(V, A) = (V_\theta, A_\theta)$<br>$Q = A + V$<br>$\pi = \text{softmax}(A/\tau)$                                                                | $\nabla L_Q$                                      | $\langle \nabla L_V, \nabla \mathcal{J} \rangle$<br>$\langle \nabla L_Q, \nabla \mathcal{J} \rangle$<br>$\langle \nabla L_V, \nabla L_Q \rangle$ |
| R2D2 ver.1 | $(V, A) = (V_\theta, A_\theta)$<br>$Q = A + V$<br>$\pi = \text{softmax}(A/\tau)$                                                                | $0.5\nabla L_V + \nabla L_Q$                      | $\langle \nabla L_V, \nabla \mathcal{J} \rangle$<br>$\langle \nabla L_Q, \nabla \mathcal{J} \rangle$<br>$\langle \nabla L_V, \nabla L_Q \rangle$ |
| R2D2+CASA  | $(V, A) = (V_\theta, A_\theta)$ ,<br>$\pi = \text{softmax}(A/\tau)$ ,<br>$\bar{A} = A - \text{sg}(\pi) \cdot A$<br>$Q = \bar{A} + \text{sg}(V)$ | $0.5\nabla L_V + \nabla L_Q + \nabla \mathcal{J}$ | $\langle \nabla L_V, \nabla \mathcal{J} \rangle$<br>$\langle \nabla L_Q, \nabla \mathcal{J} \rangle$<br>$\langle \nabla L_V, \nabla L_Q \rangle$ |

Table 6: R2D2 is the original R2D2. R2D2 ver.1 is adapted version to include  $\nabla L_V$  for training. R2D2+CASA is applying CASA on R2D2, which is described in Sec. 4.2

To understand the behavior of

$$\beta = \langle (Q^\pi - Q_\theta)\nabla_\theta Q_\theta, (Q^\pi - V_\theta)\nabla_\theta \log \pi_\theta \rangle$$

in reinforcement learning algorithms, we choose PPO as a representative as policy-based methods and R2D2 as a representative as value-based algorithms.

Define

$$L_V(\theta) = \mathbb{E}_\pi[(V^\pi - V_\theta)^2], \quad L_Q(\theta) = \mathbb{E}_\pi[(Q^\pi - Q_\theta)^2],$$

and

$$\nabla_\theta \mathcal{J}(\theta) = \mathbb{E}_\pi[(Q^\pi - V_\theta) \nabla_\theta \log \pi].$$

We usually have above three kinds of loss functions in reinforcement learning, which aim to estimate the state values, state-action values and the policy. We do not talk about the estimations of  $V^\pi$  and  $Q^\pi$  as they are estimated as their usual way of PPO's and R2D2's. All hyperparameters are listed in Appendix D

The fact that PPO only has  $\nabla_\theta L_V$  and  $\nabla_\theta \mathcal{J}$  and R2D2 only has  $\nabla_\theta L_Q$  is the main difficulty to track both the gradients of policy improvement and policy evaluation. To solve the problem, we adjust PPO and R2D2 with different versions.

For PPO, we displace the estimation of  $V_\theta$  by  $sg(\pi) \cdot Q_\theta$ , where  $Q_\theta$  is estimated by function approximation and  $V$  is estimated by taking the expectation of  $Q_\theta$ . All versions of PPO are listed in Table 5

For R2D2, we point out that though we apply  $\epsilon$ -greedy to interact with environments,  $\epsilon$  is only used for exploration and the final target policy of value-based methods is simply  $\arg \max Q_\theta$ . Because  $\arg \max Q_\theta$  breaks the gradient, we use a surrogate policy to approximate the gradient of policy improvement. Since R2D2 uses dueling structure and  $\text{softmax}(A_\theta/\tau) = \text{softmax}(Q_\theta/\tau) \xrightarrow{\tau \rightarrow 0^+} \arg \max Q_\theta$ , we use  $\pi_{\text{surrogate}} = \text{softmax}(A_\theta/\tau)$  to calculate the policy gradient. We only use  $\pi_{\text{surrogate}}$  on learner to calculate the gradient, the policy that interacts with environments is still  $\epsilon$ -greedy. All versions of R2D2 are listed in Table 6.

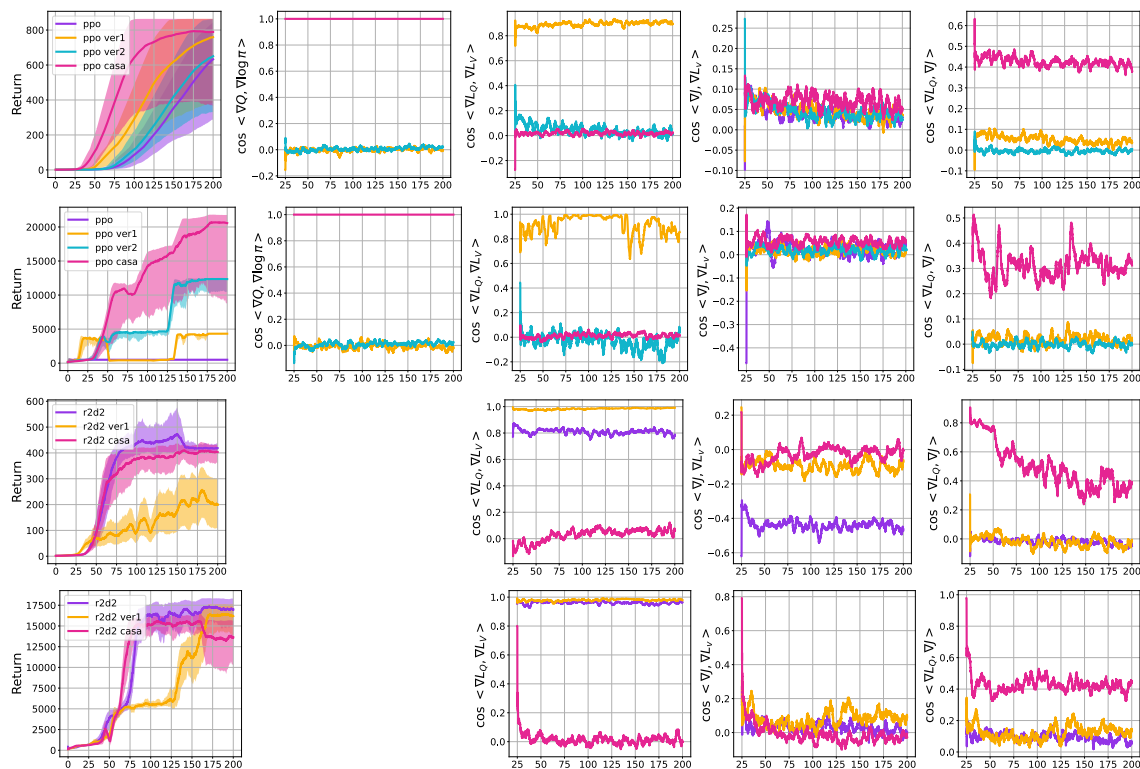

Figure 5: Angles of Gradients and Returns of versions of PPO and R2D2 defined in Table 5 and Table 6

## B DR-TRACE

As CASA estimates  $(V, Q, \pi)$ , we would ask **i)** how to guarantee that  $\tilde{\pi}_{VTrace} = \tilde{\pi}_{ReTrace}$ , **ii)** how to exploit  $(V, Q, \pi)$  to make a better estimation. Though we can apply V-Trace to estimate  $V$  and ReTrace to estimate  $Q$  with proper hyperparameters to guarantee  $\tilde{\pi}_{VTrace} = \tilde{\pi}_{ReTrace}$ , it's more reasonable to estimate  $(V, Q)$  together. Inspired by Doubly Robust, which is shown to maximally reduce the variance, we introduce DR-Trace, which estimates  $V$  by

$$V_{DR}^{\tilde{\pi}}(s_t) \stackrel{def}{=} \mathbb{E}_{\mu}[V(s_t) + \sum_{k \geq 0} \gamma^k c_{[t:t+k-1]} \rho_{t+k} \delta_{t+k}^{DR}],$$

where  $\delta_t^{DR} \stackrel{def}{=} r_t + \gamma V(s_{t+1}) - Q(s_t, a_t)$  is one-step Doubly Robust error,  $\rho_t \stackrel{def}{=} \min\{\frac{\pi_t}{\mu_t}, \bar{\rho}\}$  and  $c_t \stackrel{def}{=} \min\{\frac{\pi_t}{\mu_t}, \bar{c}\}$  are clipped per-step importance sampling,  $c_{[t:t+k]} \stackrel{def}{=} \prod_{i=0}^k c_{t+i}$ .

With one step Bellman equation, we estimate  $Q$  by

$$\begin{aligned} Q_{DR}^{\tilde{\pi}}(s_t, a_t) &\stackrel{def}{=} \mathbb{E}_{s_{t+1}, r_t \sim p(\cdot, \cdot | s_t, a_t)} [r_t + \gamma V_{DR}^{\tilde{\pi}}(s_{t+1})] \\ &= \mathbb{E}_{\mu}[Q(s_t, a_t) + \sum_{k \geq 0} \gamma^k c_{[t+1:t+k-1]} \tilde{\rho}_{t,k} \delta_{t+k}^{DR}], \end{aligned}$$

where  $\tilde{\rho}_{t,k} = 1_{\{k=0\}} + 1_{\{k>0\}} \rho_{t+k}$ .

**Theorem 2.** Define  $\bar{A} = A - \mathbb{E}_{\pi}[A]$ ,  $Q = \bar{A} + sg(V)$ ,

$$\mathcal{T}(Q) \stackrel{def}{=} \mathbb{E}_{\mu}[Q(s_t, a_t) + \sum_{k \geq 0} \gamma^k c_{[t+1:t+k-1]} \tilde{\rho}_{t,k} \delta_{t+k}^{DR}],$$

$$\mathcal{S}(V) \stackrel{def}{=} \mathbb{E}_{\mu}[V(s_t) + \sum_{k \geq 0} \gamma^k c_{[t:t+k-1]} \rho_{t,k} \delta_{t+k}^{DR}],$$

$$\mathcal{U}(Q, V) = (\mathcal{T}(Q) - \mathbb{E}_{\pi}[Q] + \mathcal{S}(V), \mathcal{S}(V)),$$

$$\mathcal{U}^{(n)}(Q, V) = \mathcal{U}(\mathcal{U}^{(n-1)}(Q, V)),$$

then  $\mathcal{U}^{(n)}(Q, V) \rightarrow (Q^{\tilde{\pi}}, V^{\tilde{\pi}})$  that corresponds to

$$\tilde{\pi}(a|s) = \frac{\min\{\bar{\rho}\mu(a|s), \pi(a|s)\}}{\sum_{b \in \mathcal{A}} \min\{\bar{\rho}\mu(b|s), \pi(b|s)\}}.$$

as  $n \rightarrow +\infty$ .

*Proof.* See Appendix [C](#) Theorem [C.1](#) □

Theorem [2](#) shows that DR-Trace is a contraction mapping and  $(V, Q)$  converges to  $(V^{\tilde{\pi}}, Q^{\tilde{\pi}})$  that corresponds to

$$\tilde{\pi}(a|s) = \frac{\min\{\bar{\rho}\mu(a|s), \pi(a|s)\}}{\sum_{b \in \mathcal{A}} \min\{\bar{\rho}\mu(b|s), \pi(b|s)\}}.$$

According to our proof, DR-Trace should work similar to V-Trace and ReTrace, as the convergence rate and the limitation are same. We compare DR-Trace with V-Trace+ReTrace in Figure [6](#) where we replace estimation of state values by V-Trace and estimation of state-action values by ReTrace. We call V-Trace+ReTrace as No-DR-Trace for brevity. No-DR-Trace performs better on Breakout and ChopperCommand, but fails to make a breakthrough on Krull. Recalling the fact that Doubly Robust can maximally reduce the variance of Bellman error, No-DR-Trace is less stable but also potential to achieve a better performance. A conclusion cannot be made about No-DR-Trace, as this phenomenon means that No-DR-Trace is less stable than DR-Trace, but it also holds the potential to achieve a better performance.

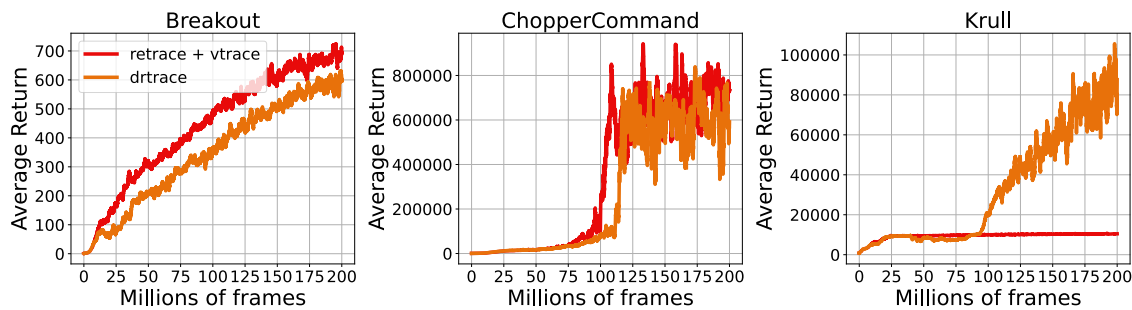

Figure 6: Ablation study for w/wo DR-Trace on Breakout, ChopperCommand and Krull.

## C PROOFS

**Lemma C.1.** (i) Define  $\pi = \text{softmax}(A/\tau)$ , then  $\nabla \log \pi = (\mathbf{I} - \pi) \frac{\nabla A}{\tau}$ . (ii) Denote  $sg$  to be stop gradient and define  $\bar{A} = A - \mathbb{E}_\pi[A]$ ,  $Q = \bar{A} + sg(V)$ , then  $\nabla Q = (\mathbf{I} - \pi) \nabla A$ .

*Proof.* As  $Q = \bar{A} + sg(V) = A - sg(\pi) \cdot A + sg(V)$ , it's obvious that  $\nabla Q = (\mathbf{I} - \pi) \nabla A$ .

For  $\log \pi$ , it's a standard derivative of cross entropy, so we have  $\nabla \log \pi = (\mathbf{I} - \pi) \nabla (A/\tau) = (\mathbf{I} - \pi) \frac{\nabla A}{\tau}$ .  $\square$

**Lemma C.2.** Define  $\bar{A} = A - \mathbb{E}_\pi[A]$ ,  $Q = \bar{A} + sg(V)$ ,  $\pi = \text{softmax}(A/\tau)$ , then

$$\mathbb{E}_\pi [(Q - V) \nabla \log \pi] = -\tau \nabla \mathbf{H}[\pi].$$

*Proof.* Since

$$\pi = \exp(A/\tau)/Z, \quad Z = \int_{\mathcal{A}} \exp(A/\tau),$$

we have

$$A = \tau \log \pi + \tau \log Z.$$

Based on the observation that  $\mathbb{E}_\pi [f(s) \nabla \log \pi(\cdot|s)] = 0$ , we have

$$\mathbb{E}_\pi [\mathbb{E}_\pi[A] \cdot \nabla \log \pi] = 0,$$

$$\mathbb{E}_\pi [\log Z \cdot \nabla \log \pi] = 0.$$

On the one hand,

$$\begin{aligned} \mathbb{E}_\pi [(Q - V) \nabla \log \pi] &= \mathbb{E}_\pi [A \nabla \log \pi] - \mathbb{E}_\pi [\mathbb{E}_\pi[A] \cdot \nabla \log \pi] \\ &= \tau \mathbb{E}_\pi [\log \pi \nabla \log \pi] + \tau \mathbb{E}_\pi [\log Z \cdot \nabla \log \pi] \\ &= \tau \mathbb{E}_\pi [\log \pi \nabla \log \pi]. \end{aligned}$$

On the other hand,

$$\begin{aligned}
\nabla \mathbf{H}[\pi] &= -\nabla \int_{\mathcal{A}} \pi_i \log \pi_i \\
&= -\int_{\mathcal{A}} \nabla \pi_i \cdot \log \pi_i - \int_{\mathcal{A}} \pi_i \nabla \log \pi_i \\
&= -\int_{\mathcal{A}} \pi_i \nabla \log \pi_i \cdot \log \pi_i - \int_{\mathcal{A}} \pi_i \frac{\nabla \pi_i}{\pi_i} \\
&= -\mathbb{E}_{\pi} [\log \pi \nabla \log \pi].
\end{aligned}$$

Hence,  $\mathbb{E}_{\pi} [(Q - V) \nabla \log \pi] = -\tau \nabla \mathbf{H}[\pi]$ .  $\square$

**Theorem C.1.** Define  $\bar{A} = A - \mathbb{E}_{\pi}[A]$ ,  $Q = \bar{A} + sg(V)$ . Define

$$\begin{aligned}
\mathcal{T}(Q) &\stackrel{def}{=} \mathbb{E}_{\mu}[Q(s_t, a_t) + \sum_{k \geq 0} \gamma^k c_{[t+1:t+k-1]} \tilde{\rho}_{t,k} \delta_{t+k}^{DR}], \\
\mathcal{S}(V) &\stackrel{def}{=} \mathbb{E}_{\mu}[V(s_t) + \sum_{k \geq 0} \gamma^k c_{[t:t+k-1]} \rho_{t,k} \delta_{t+k}^{DR}], \\
\mathcal{U}(Q, V) &= (\mathcal{T}(Q) - \mathbb{E}_{\pi}[Q] + \mathcal{S}(V), \mathcal{S}(V)), \\
\mathcal{U}^{(n)}(Q, V) &= \mathcal{U}(\mathcal{U}^{(n-1)}(Q, V)),
\end{aligned}$$

then  $\mathcal{U}^{(n)}(Q, V) \rightarrow (Q^{\tilde{\pi}}, V^{\tilde{\pi}})$  that corresponds to

$$\tilde{\pi}(a|s) = \frac{\min \{\bar{\rho}\mu(a|s), \pi(a|s)\}}{\sum_{b \in \mathcal{A}} \min \{\bar{\rho}\mu(b|s), \pi(b|s)\}}.$$

as  $n \rightarrow +\infty$ .

**Remark.**  $\mathcal{T}(Q) - \mathbb{E}_{\pi}[Q] + \mathcal{S}(V)$  is **exactly** how  $Q$  is updated at training time. Since  $Q = \bar{A} + sg(V)$ , if we apply gradient ascent on  $Q$  and  $V$  in directions  $\nabla L_Q(\theta)$  and  $\nabla L_V(\theta)$  respectively, change of  $Q$  comes from two aspects. One comes from  $\nabla L_Q(\theta)$ , which changes  $A$ , the other comes from  $\nabla L_V(\theta)$ , which changes  $V$ . Because the gradient of  $V$  is stopped when estimating  $Q$ , the latter is captured by "minus old baseline, add new baseline", which is  $-\mathbb{E}_{\pi}[Q] + \mathcal{S}(V)$  in Theorem [C.1](#).

*Proof.* Define

$$\begin{aligned}
\tilde{\mathcal{T}}(Q) &= -\mathbb{E}_{\pi}[Q] + \mathcal{T}(Q), \\
\tilde{\mathcal{U}}(Q, V) &= (\tilde{\mathcal{T}}(Q), \mathcal{S}(V)), \\
\tilde{\mathcal{U}}^{(n)}(Q, V) &= \tilde{\mathcal{U}}(\tilde{\mathcal{U}}^{(n-1)}(Q, V)).
\end{aligned}$$

By Lemma [C.3](#),  $\tilde{\mathcal{T}}^{(n)}(Q)$  converges to some  $A^*$  as  $n \rightarrow \infty$ . This process will not influence the estimation of  $V$  as the gradient of  $V$  is stopped when estimating  $Q$ . According to the proof,  $A^*$  does not depend on  $V$ .

By Lemma [C.4](#),  $\mathcal{S}^{(n)}(V)$  converges to some  $V^*$  as  $n \rightarrow \infty$ .

Hence, we have

$$\tilde{\mathcal{U}}^{(n)}(Q, V) \rightarrow (A^*, V^*) \text{ as } n \rightarrow +\infty.$$

By definition,

$$\mathcal{U}(Q, V) = (\tilde{\mathcal{T}}(Q) + \mathcal{S}(V), \mathcal{S}(V)),$$

we can regard  $\widetilde{\mathcal{T}}(Q) + \mathcal{S}(V)$  as  $Q$  and regard  $\mathcal{S}(V)$  as  $V$ , then

$$\begin{aligned}\mathcal{U}^{(2)}(Q, V) &= \mathcal{U}(\widetilde{\mathcal{T}}(Q) + \mathcal{S}(V), \mathcal{S}(V)) \\ &= (\mathcal{T}(\widetilde{\mathcal{T}}(Q) + \mathcal{S}(V)) - \mathcal{S}(V) + \mathcal{S}^{(2)}(V), \mathcal{S}^{(2)}(V)) \\ &= (\widetilde{\mathcal{T}}^{(2)}(Q) + \mathcal{S}^{(2)}(V), \mathcal{S}^{(2)}(V)).\end{aligned}$$

By induction,

$$\begin{aligned}\mathcal{U}^{(n)}(Q, V) &= (\widetilde{\mathcal{T}}^{(n)}(Q) + \mathcal{S}^{(n)}(V), \mathcal{S}^{(n)}(V)) \\ &\rightarrow (A^* + V^*, V^*) \text{ as } n \rightarrow +\infty.\end{aligned}$$

Same as (Espeholt et al. 2018),

$$\tilde{\pi}(a|s) = \frac{\min\{\bar{\rho}\mu(a|s), \pi(a|s)\}}{\sum_{b \in \mathcal{A}} \min\{\bar{\rho}\mu(b|s), \pi(b|s)\}}.$$

is the policy s.t. the Bellman equation holds, which is

$$\mathbb{E}_\mu[\rho_t(r_t + \gamma V_{t+1} - V_t) | \mathcal{F}_t] = 0,$$

and  $\mathcal{U}(Q^{\tilde{\pi}}, V^{\tilde{\pi}}) = (Q^{\tilde{\pi}}, V^{\tilde{\pi}})$ .

So we have  $(A^* + V^*, V^*) = (Q^{\tilde{\pi}}, V^{\tilde{\pi}})$ . □

**Lemma C.3.** Define  $\bar{A} = A - \mathbb{E}_\pi[A]$ ,  $Q = \bar{A} + sg(V)$ , then operator

$$\mathcal{T}(Q) \stackrel{def}{=} \mathbb{E}_\mu[Q(s_t, a_t) + \sum_{k \geq 0} \gamma^k c_{[t+1:t+k-1]} \tilde{\rho}_{t,k} \delta_{t+k}^{DR}]$$

is a contraction mapping w.r.t.  $Q$ .

**Remark.** Note that  $\mathcal{T}(Q)$  is exactly equation B

Since  $Q = A + sg(V)$ , the gradient of  $V$  is stopped when estimating  $Q$ , updating  $Q$  will not change  $V$ , which is equivalent to updating  $A$ . Without loss of generality, we assume  $V$  is fixed as  $V^*$  in the proof.

*Proof.*  $\bar{A} = A - \mathbb{E}_\pi[A]$  shows  $\mathbb{E}_\pi[\bar{A}] = 0$ , which guarantees that no matter how we update  $A$ , we always have  $\mathbb{E}_\pi[Q] = V^*$ .

Based on above observations, define

$$\widetilde{\mathcal{T}}(Q) \stackrel{def}{=} -\mathbb{E}_\pi[Q] + \mathcal{T}(Q).$$

It's obvious that we only need to prove  $\widetilde{\mathcal{T}}(Q)$  is a contraction mapping.

For brevity, we denote

$$Q_t = Q(s_t, a_t), A_t = A(s_t, a_t), V_t^* = V^*(s_t).$$

Noticing that  $\tilde{\rho}_{t,0} = 1$ , let  $\mathcal{F}$  represent filtration, we can rewrite  $\widetilde{\mathcal{T}}$  as

$$\begin{aligned}\widetilde{\mathcal{T}}(Q) &= \mathbb{E}_\mu[A_t + \sum_{k \geq 0} \gamma^k c_{[t+1:t+k-1]} \tilde{\rho}_{t,k} \delta_{t+k}^{DR}] \\ &= \mathbb{E}_\mu[-V_t^* + \sum_{k \geq 0} \gamma^k c_{[t+1:t+k-1]} \tilde{\rho}_{t,k} r_{t+k} + \sum_{k \geq 0} \gamma^{k+1} c_{[t+1:t+k-1]} \Delta_k],\end{aligned}\tag{9}$$

where

$$\Delta_k = \mathbb{E}_\mu [\tilde{\rho}_{t,k} V_{t+k+1}^* - c_{t+k} \tilde{\rho}_{t,k+1} Q_{t+k+1} | \mathcal{F}_{t+k}]. \quad (10)$$

By definition of  $Q$ ,

$$\mathbb{E}_\mu [V_{t+k+1}^* | \mathcal{F}_{t+k}] = \mathbb{E}_\mu [\mathbb{E}_\pi [Q_{t+k+1} | \mathcal{F}_{t+k+1}] | \mathcal{F}_{t+k}],$$

we can rewrite equation 10 as

$$\Delta_k = \mathbb{E}_\mu [(\tilde{\rho}_{t,k} \frac{\pi_{t+k+1}}{\mu_{t+k+1}} - c_{t+k} \tilde{\rho}_{t,k+1}) Q_{t+k+1} | \mathcal{F}_{t+k}]. \quad (11)$$

For any  $Q_1 = A_1 + sg(V^*)$ ,  $Q_2 = A_2 + sg(V^*)$ , since

$$\mathbb{E}_\mu [(\tilde{\rho}_{t,k} \frac{\pi_{t+k+1}}{\mu_{t+k+1}} - c_{t+k} \tilde{\rho}_{t,k+1}) | \mathcal{F}_{t+k}] \geq 0,$$

by equation 9 equation 11 we have

$$\|\widetilde{\mathcal{T}}(Q_1) - \widetilde{\mathcal{T}}(Q_2)\| \leq \mathcal{C} \|Q_1 - Q_2\|,$$

where

$$\begin{aligned} \mathcal{C} &= \mathbb{E}_\mu [\sum_{k \geq 0} \gamma^{k+1} c_{[t+1:t+k-1]} (\tilde{\rho}_{t,k} \frac{\pi_{t+k+1}}{\mu_{t+k+1}} - c_{t+k} \tilde{\rho}_{t,k+1})] \\ &= \mathbb{E}_\mu [1 - 1 + \sum_{k \geq 0} \gamma^{k+1} c_{[t+1:t+k-1]} (\tilde{\rho}_{t,k} - c_{t+k} \tilde{\rho}_{t,k+1})] \\ &= 1 - (1 - \gamma) \mathbb{E}_\mu [\sum_{k \geq 0} \gamma^k c_{[t+1:t+k-1]} \tilde{\rho}_{t,k}] \\ &\leq 1 - (1 - \gamma) < 1. \end{aligned}$$

Hence,  $\widetilde{\mathcal{T}}(Q)$  is a contraction mapping and converges to some fixed function, which we denote as  $A^*$ . So  $\mathcal{T}(Q)$  is also a contraction mapping and converges to  $A^* + V^*$ .  $\square$

**Lemma C.4.** Define  $Q = A + sg(V)$  with  $\mathbb{E}_\pi[A] = 0$ , then operator

$$\mathcal{S}(V) \stackrel{def}{=} \mathbb{E}_\mu [V(s_t) + \sum_{k \geq 0} \gamma^k c_{[t:t+k-1]} \rho_{t,k} \delta_{t+k}^{DR}]$$

is a contraction mapping w.r.t.  $V$ .

**Remark.** Note that  $\mathcal{S}(V)$  is exactly equation B

*Proof.* Same as Lemma C.3 we can get

$$\Delta_k = \mathbb{E}_\mu [(\rho_{t+k} - c_{t+k} \rho_{t+k+1}) V_{t+k+1} - c_{t+k} \rho_{t+k+1} A_{t+k+1}^* | \mathcal{F}_{t+k}],$$

so we have

$$\Delta_k^1 - \Delta_k^2 = \mathbb{E}_\mu [(\rho_{t+k} - c_{t+k} \rho_{t+k+1}) \cdot (V_{t+k+1}^1 - V_{t+k+1}^2) | \mathcal{F}_{t+k}].$$

The remaining proof is identical to Espeholt et al. 2018's.  $\square$

## D HYPERPARAMETERS

Our python packages are shown in Table 7

| Package               | Version           |
|-----------------------|-------------------|
| ale-py                | 0.6.0.dev20200207 |
| gym                   | 0.19.0            |
| tensorflow            | 1.15.2            |
| opencv-python         | 4.1.2.30          |
| opencv-contrib-python | 4.4.0.46          |

Table 7: Versions for python packages among all experiments.

All experiments follow the shared hyperparameters as in Table 8. The specific hyperparameters for PPO, R2D2 and CASA+DR-Trace are shown in Table 9, Table 10 and Table 11. The only exceptions are  $V$ -loss scaling,  $Q$ -loss scaling and  $\pi$ -loss scaling, which may be zero depending on some specific ablation settings. We will state these three hyperparameters every time in all experiments.

| Parameter                          | Value                            |
|------------------------------------|----------------------------------|
| Atari Version                      | NoFrameskip-v4                   |
| Atari Wrapper                      | gym.wrappers.atari_preprocessing |
| Image Size                         | (84, 84)                         |
| Grayscale                          | Yes                              |
| Num. Action Repeats                | 4                                |
| Num. Frame Stacks                  | 4                                |
| Action Space                       | Full                             |
| End of Episode When Life Lost      | No                               |
| Num. States                        | 200M                             |
| Num. Environments                  | 160                              |
| Random No-ops                      | 30                               |
| Burn-in                            | 40                               |
| Seq-length                         | 80                               |
| Burn-in Stored Recurrent State     | Yes                              |
| Bootstrap                          | Yes                              |
| Batch size                         | 64                               |
| Backbone                           | IMPALA,deep                      |
| LSTM Units                         | 256                              |
| Optimizer                          | Adam Weight Decay                |
| Weight Decay Rate                  | 0.01                             |
| Weight Decay Schedule              | Anneal linearly to 0             |
| Learning Rate                      | 5e-4                             |
| Warmup Steps                       | 4000                             |
| Learning Rate Schedule             | Anneal linearly to 0             |
| AdamW $\beta_1$                    | 0.9                              |
| AdamW $\beta_2$                    | 0.98                             |
| AdamW $\epsilon$                   | 1e-6                             |
| AdamW Clip Norm                    | 50.0                             |
| Learner Push Model Every $n$ Steps | 25                               |
| Actor Pull Model Every $n$ Steps   | 64                               |

Table 8: Configurations for shared hyperparameters among all experiments.



| Parameter                          | Value                  |
|------------------------------------|------------------------|
| Sample Reuse                       | 1                      |
| Reward Shape                       | $\text{clip}(r, 0, 1)$ |
| Discount ( $\gamma$ )              | 0.995                  |
| V-loss Scaling ( $\alpha_1$ )      | 0.5                    |
| Q-loss Scaling ( $\alpha_2$ )      | 1.0                    |
| $\pi$ -loss Scaling ( $\alpha_3$ ) | 1.0                    |
| PPO clip $\epsilon$                | 0.2                    |
| GAE $\lambda$                      | 0.8                    |
| Temperature ( $\tau$ )             | 0.1                    |

Table 9: Hyperparameter configurations for PPO.

| Parameter                          | Value                                                                                                |
|------------------------------------|------------------------------------------------------------------------------------------------------|
| Sample Reuse                       | 2                                                                                                    |
| Target Shape                       | $Q_t^{\tilde{\pi}} = h(\sum_{i=0}^{n-1} \gamma^i r_{t+i} + \gamma^n h^{-1}(\text{Double}(Q_{t+n})))$ |
| Target Shape Function $h$          | $h(x) = \text{sign}(x) \cdot (\sqrt{ x  + 1} - 1) + 10^{-3}x$                                        |
| Bootstrap Length $n$               | 5                                                                                                    |
| $\epsilon$ -greedy                 | $\epsilon \sim 0.4^{\text{uniform}(1,8)}$                                                            |
| PER Sample Temperature $\alpha$    | 0.9                                                                                                  |
| PER Buffer Size                    | 400000                                                                                               |
| Discount ( $\gamma$ )              | 0.997                                                                                                |
| V-loss Scaling ( $\alpha_1$ )      | 0.5                                                                                                  |
| Q-loss Scaling ( $\alpha_2$ )      | 1.0                                                                                                  |
| $\pi$ -loss Scaling ( $\alpha_3$ ) | 1.0                                                                                                  |
| Temperature ( $\tau$ )             | 0.1                                                                                                  |

Table 10: Hyperparameter configurations for R2D2.

| Parameter                             | Value                                                              |
|---------------------------------------|--------------------------------------------------------------------|
| Sample Reuse                          | 2                                                                  |
| Reward Shape                          | $\log( r  + 1.0) \cdot (2 \cdot 1_{\{r \geq 0\}} - 1_{\{r < 0\}})$ |
| Discount ( $\gamma$ )                 | 0.997                                                              |
| V-loss Scaling ( $\alpha_1$ )         | 1.0                                                                |
| Q-loss Scaling ( $\alpha_2$ )         | 10.0                                                               |
| $\pi$ -loss Scaling ( $\alpha_3$ )    | 10.0                                                               |
| Temperature ( $\tau$ )                | 1.0                                                                |
| Importance Sampling Clip $\bar{c}$    | 1.05                                                               |
| Importance Sampling Clip $\bar{\rho}$ | 1.05                                                               |

Table 11: Hyperparameter configurations for CASA + DR-Trace.

## E EVALUATION OF CASA ON ATARI GAMES

Random scores and average human’s scores are from (Badia et al., 2020). Human World Records (HWR) are from (Toromanoff et al., 2019). Rainbow’s scores are from (Hessel et al., 2017). IMPALA’s scores are from (Espeholt et al., 2018). LASER’s scores are from (Schmitt et al., 2020), no sweep at 200M.

| Games             | RND     | HUMAN          | RAINBOW         | HNS(%)         | IMPALA           | HNS(%)         | LASER           | HNS(%)          | CASA           | HNS(%)          |
|-------------------|---------|----------------|-----------------|----------------|------------------|----------------|-----------------|-----------------|----------------|-----------------|
| Scale             |         |                | 200M            |                | 200M             |                | 200M            |                 | 200M           |                 |
| alien             | 227.8   | 7127.8         | 9491.7          | 134.26         | 15962.1          | 228.03         | <b>35565.9</b>  | <b>512.15</b>   | 26137          | 375.50          |
| amidar            | 5.8     | 1719.5         | <b>5131.2</b>   | <b>299.08</b>  | 1554.79          | 1829.2         |                 | 106.4           | 560            | 32.34           |
| assault           | 222.4   | 742            | 14198.5         | 2689.78        | 19148.47         | 3642.43        | <b>21560.4</b>  | <b>4106.62</b>  | 16228          | 3080.37         |
| asterix           | 210     | 8503.3         | <b>428200</b>   | <b>5160.67</b> | 300732           | 3623.67        | 240090          | 2892.46         | 213580         | 2572.80         |
| asteroids         | 719     | 47388.7        | 2712.8          | 4.27           | 108590.05        | 231.14         | <b>213025</b>   | <b>454.91</b>   | 80339          | 170.60          |
| atlantis          | 12850   | 29028.1        | 826660          | 5030.32        | 849967.5         | 5174.39        | 841200          | 5120.19         | <b>3211600</b> | <b>19772.10</b> |
| bank heist        | 14.2    | 753.1          | <b>1358</b>     | <b>181.86</b>  | 1223.15          | 163.61         | 569.4           | 75.14           | 895.3          | 119.24          |
| battle zone       | 236     | 37187.5        | 62010           | 167.18         | 20885            | 55.88          | 64953.3         | 175.14          | <b>91269</b>   | <b>246.36</b>   |
| beam rider        | 363.9   | 16926.5        | 16850.2         | 99.54          | 32463.47         | 193.81         | <b>90881.6</b>  | <b>546.52</b>   | 57456          | 344.70          |
| berzerk           | 123.7   | 2630.4         | 2545.6          | 96.62          | 1852.7           | 68.98          | <b>25579.5</b>  | <b>1015.51</b>  | 1648           | 60.81           |
| bowling           | 23.1    | 160.7          | 30              | 5.01           | 59.92            | 26.76          | 48.3            | 18.31           | <b>162.4</b>   | <b>101.24</b>   |
| boxing            | 0.1     | 12.1           | 99.6            | 829.17         | 99.96            | 832.17         | <b>100</b>      | <b>832.5</b>    | 98.3           | 818.33          |
| breakout          | 1.7     | 30.5           | 417.5           | 1443.75        | <b>787.34</b>    | <b>2727.92</b> | 747.9           | 2590.97         | 624.3          | 2161.81         |
| centipede         | 2090.9  | 12017          | 8167.3          | 61.22          | 11049.75         | 90.26          | <b>292792</b>   | <b>2928.65</b>  | 102600         | 1012.57         |
| chopper command   | 811     | 7387.8         | 16654           | 240.89         | 28255            | 417.29         | <b>761699</b>   | <b>11569.27</b> | 616690         | 9364.42         |
| crazy climber     | 10780.5 | 36829.4        | <b>168788.5</b> | <b>630.80</b>  | 136950           | 503.69         | 167820          | 626.93          | 161250         | 600.70          |
| defender          | 2874.5  | 18688.9        | 55105           | 330.27         | 185203           | 1152.93        | 336953          | 2112.50         | <b>421600</b>  | <b>2647.75</b>  |
| demon attack      | 152.1   | 1971           | 111185          | 6104.40        | 132826.98        | 7294.24        | 133530          | 7332.89         | <b>291590</b>  | <b>16022.76</b> |
| double dunk       | -18.6   | -16.4          | -0.3            | 831.82         | -0.33            | 830.45         | 14              | 1481.82         | <b>20.25</b>   | <b>1765.91</b>  |
| enduro            | 0       | 860.5          | 2125.9          | 247.05         | 0                | 0.00           | 0               | 0.00            | <b>10019</b>   | <b>1164.32</b>  |
| fishing derby     | -91.7   | -38.8          | 31.3            | 232.51         | 44.85            | 258.13         | 45.2            | 258.79          | <b>53.24</b>   | <b>273.99</b>   |
| freeway           | 0       | 29.6           | <b>34</b>       | <b>114.86</b>  | 0                | 0.00           | 0               | 0.00            | 3.46           | 11.69           |
| frostbite         | 65.2    | 4334.7         | <b>9590.5</b>   | <b>223.10</b>  | 317.75           | 5.92           | 5083.5          | 117.54          | 1583           | 35.55           |
| gopher            | 257.6   | 2412.5         | 70354.6         | 3252.91        | 66782.3          | 3087.14        | 114820.7        | 5316.40         | <b>188680</b>  | <b>8743.90</b>  |
| gravitar          | 173     | 3351.4         | 1419.3          | 39.21          | 359.5            | 5.87           | 1106.2          | 29.36           | <b>4311</b>    | <b>130.19</b>   |
| hero              | 1027    | 30826.4        | <b>55887.4</b>  | <b>184.10</b>  | 33730.55         | 109.75         | 31628.7         | 102.69          | 24236          | 77.88           |
| ice hockey        | -11.2   | 0.9            | 1.1             | 101.65         | 3.48             | 121.32         | <b>17.4</b>     | <b>236.36</b>   | 1.56           | 105.45          |
| jamesbond         | 29      | 302.8          | 19809           | 72.24          | 601.5            | 209.09         | <b>37999.8</b>  | <b>13868.08</b> | 12468          | 4543.10         |
| kangaroo          | 52      | 3035           | <b>14637.5</b>  | <b>488.05</b>  | 1632             | 52.97          | 14308           | 477.91          | 5399           | 179.25          |
| krull             | 1598    | 2665.5         | 8741.5          | 669.18         | 8147.4           | 613.53         | 9387.5          | 729.70          | <b>64347</b>   | <b>5878.13</b>  |
| kung fu master    | 258.5   | 22736.3        | 52181           | 230.99         | 43375.5          | 191.82         | <b>607443</b>   | <b>2701.26</b>  | 124630.1       | 553.31          |
| montezuma revenge | 0       | <b>4753.3</b>  | 384             | 8.08           | 0                | 0.00           | 0.3             | 0.01            | 2488.4         | 52.35           |
| ms pacman         | 307.3   | 6951.6         | 5380.4          | 76.35          | 7342.32          | 105.88         | 6565.5          | 94.19           | <b>7579</b>    | <b>109.44</b>   |
| name this game    | 2292.3  | 8049           | 13136           | 188.37         | 21537.2          | 334.30         | 26219.5         | 415.64          | <b>32098</b>   | <b>517.76</b>   |
| phoenix           | 761.5   | 7242.6         | 108529          | 1662.80        | 210996.45        | 3243.82        | <b>519304</b>   | <b>8000.84</b>  | 498590         | 7681.23         |
| pitfall           | -229.4  | <b>6463.7</b>  | 0               | 3.43           | -1.66            | 3.40           | -0.6            | 3.42            | -17.8          | 3.16            |
| pong              | -20.7   | 14.6           | 20.9            | 117.85         | 20.98            | 118.07         | <b>21</b>       | <b>118.13</b>   | 20.39          | 116.40          |
| private eye       | 24.9    | <b>69571.3</b> | 4234            | 6.05           | 98.5             | 0.11           | 96.3            | 0.10            | 134.1          | 0.16            |
| qbert             | 163.9   | 13455.0        | 33817.5         | 253.20         | <b>351200.12</b> | <b>2641.14</b> | 21449.6         | 160.15          | 27371          | 204.70          |
| riverraid         | 1338.5  | 17118.0        | 22920.8         | 136.77         | 29608.05         | 179.15         | <b>40362.7</b>  | <b>247.31</b>   | 11182          | 62.38           |
| road runner       | 11.5    | 7845           | 62041           | 791.85         | 57121            | 729.04         | 45289           | 578.00          | <b>251360</b>  | <b>3208.64</b>  |
| robotank          | 2.2     | 11.9           | 61.4            | 610.31         | 12.96            | 110.93         | <b>62.1</b>     | <b>617.53</b>   | 10.44          | 84.95           |
| seaquest          | 68.4    | <b>42054.7</b> | 15898.9         | 37.70          | 1753.2           | 4.01           | 2890.3          | 6.72            | 11862          | 28.09           |
| skiing            | -17098  | <b>-4336.9</b> | -12957.8        | 32.44          | -10180.38        | 54.21          | -29968.4        | -100.86         | -12730         | 34.23           |
| solaris           | 1236.3  | <b>12326.7</b> | 3560.3          | 20.96          | 2365             | 10.18          | 2273.5          | 9.35            | 2319           | 9.76            |
| space invaders    | 148     | 1668.7         | 18789           | 1225.82        | 43595.78         | 2857.09        | <b>51037.4</b>  | <b>3346.45</b>  | 3031           | 189.58          |
| star gunner       | 664     | 10250          | 127029          | 1318.22        | 200625           | 2085.97        | 321528          | 3347.21         | <b>337150</b>  | <b>3510.18</b>  |
| surround          | -10     | 6.5            | <b>9.7</b>      | <b>119.39</b>  | 7.56             | 106.42         | 8.4             | 111.52          | -10            | 0.00            |
| tennis            | -23.8   | -8.3           | 0               | 153.55         | 0.55             | 157.10         | <b>12.2</b>     | <b>232.26</b>   | -21.05         | 17.74           |
| time pilot        | 3568    | 5229.2         | 12926           | 563.36         | 48481.5          | 2703.84        | <b>105316</b>   | <b>6125.34</b>  | 84341          | 4862.62         |
| tutankham         | 11.4    | 167.6          | 241             | 146.99         | 292.11           | 179.71         | 278.9           | 171.25          | <b>381</b>     | <b>236.62</b>   |
| up n down         | 533.4   | 11693.2        | 125755          | 1122.08        | 332546.75        | 2975.08        | 345727          | 3093.19         | <b>416020</b>  | <b>3723.06</b>  |
| venture           | 0       | <b>1187.5</b>  | 5.5             | 0.46           | 0                | 0.00           | 0               | 0.00            | 0              | 0.00            |
| video pinball     | 0       | 17667.9        | 533936.5        | 3022.07        | <b>572898.27</b> | <b>3242.59</b> | 511835          | 2896.98         | 297920         | 1686.22         |
| wizard of wor     | 563.5   | 4756.5         | 17862.5         | 412.57         | 9157.5           | 204.96         | <b>29059.3</b>  | <b>679.60</b>   | 26008          | 606.83          |
| yars revenge      | 3092.9  | 54576.9        | 102557          | 193.19         | 84231.14         | 157.60         | <b>166292.3</b> | <b>316.99</b>   | 118730         | 224.61          |
| zaxxon            | 32.5    | 9173.3         | 22209.5         | 242.62         | 32935.5          | 359.96         | 41118           | 449.47          | <b>46070.8</b> | <b>503.66</b>   |
| MEAN HNS(%)       | 0.00    | 100.00         |                 | 873.97         |                  | 957.34         |                 | 1741.36         |                | 1941.08         |
| MEDIAN HNS(%)     | 0.00    | 100.00         |                 | 230.99         |                  | 191.82         |                 | 454.91          |                | 246.36          |

| Games             | RND     | HWR             | RAINBOW    | SABER(%)      | IMPALA    | SABER(%) | LASER          | SABER(%)      | CASA          | SABER(%)      |
|-------------------|---------|-----------------|------------|---------------|-----------|----------|----------------|---------------|---------------|---------------|
| Scale             |         |                 | 200M       |               | 200M      |          | 200M           |               | 200M          |               |
| alien             | 227.8   | <b>251916</b>   | 9491.7     | 3.68          | 15962.1   | 6.25     | 976.51         | 14.04         | 26137         | 10.29         |
| amidar            | 5.8     | <b>104159</b>   | 5131.2     | 4.92          | 1554.79   | 1.49     | 1829.2         | 1.75          | 560           | 0.53          |
| assault           | 222.4   | 8647            | 14198.5    | 165.90        | 19148.47  | 200.00   | <b>21560.4</b> | <b>200.00</b> | 16228         | 189.99        |
| asterix           | 210     | <b>1000000</b>  | 428200     | 42.81         | 300732    | 30.06    | 240090         | 23.99         | 213580        | 21.34         |
| asteroids         | 719     | <b>10506650</b> | 2712.8     | 0.02          | 108590.05 | 1.03     | 213025         | 2.02          | 80339         | 0.76          |
| atlantis          | 12850   | <b>10604840</b> | 826660     | 7.68          | 849967.5  | 7.90     | 841200         | 7.82          | 3211600       | 30.20         |
| bank heist        | 14.2    | <b>82058</b>    | 1358       | 1.64          | 1223.15   | 1.47     | 569.4          | 0.68          | 895.3         | 1.07          |
| battle zone       | 236     | <b>801000</b>   | 62010      | 7.71          | 20885     | 2.58     | 64953.3        | 8.08          | 91269         | 11.37         |
| beam rider        | 363.9   | <b>999999</b>   | 16850.2    | 1.65          | 32463.47  | 3.21     | 90881.6        | 9.06          | 57456         | 5.71          |
| berzerk           | 123.7   | <b>1057940</b>  | 2545.6     | 0.23          | 1852.7    | 0.16     | 25579.5        | 2.41          | 1648          | 0.14          |
| bowling           | 23.1    | <b>300</b>      | 30         | 2.49          | 59.92     | 13.30    | 48.3           | 9.10          | 162.4         | 50.31         |
| boxing            | 0.1     | <b>100</b>      | 99.6       | 99.60         | 99.96     | 99.96    | <b>100</b>     | <b>100.00</b> | 98.3          | 98.3          |
| breakout          | 1.7     | <b>864</b>      | 417.5      | 48.22         | 787.34    | 91.11    | 747.9          | 86.54         | 624.3         | 72.20         |
| centipede         | 2090.9  | <b>1301709</b>  | 8167.3     | 0.47          | 11049.75  | 0.69     | 292792         | 22.37         | 102600        | 7.73          |
| chopper command   | 811     | <b>999999</b>   | 16654      | 1.59          | 28255     | 2.75     | 761699         | 76.15         | 616690        | 61.64         |
| crazy climber     | 10780.5 | <b>219900</b>   | 168788.5   | 75.56         | 136950    | 60.33    | 167820         | 75.10         | 161250        | 71.95         |
| defender          | 2874.5  | <b>6010500</b>  | 55105      | 0.87          | 185203    | 3.03     | 336953         | 5.56          | 421600        | 6.97          |
| demon attack      | 152.1   | <b>1556345</b>  | 111185     | 7.13          | 132826.98 | 8.53     | 133530         | 8.57          | 291590        | 18.73         |
| double dunk       | -18.6   | <b>21</b>       | -0.3       | 46.21         | -0.33     | 46.14    | 14             | 82.32         | 20.25         | 98.11         |
| enduro            | 0       | 9500            | 2125.9     | 22.38         | 0         | 0.00     | 0              | 0.00          | <b>10019</b>  | <b>105.46</b> |
| fishing derby     | -91.7   | <b>71</b>       | 31.3       | 75.60         | 44.85     | 83.93    | 45.2           | 84.14         | 53.24         | 89.08         |
| freeway           | 0       | <b>38</b>       | 34         | 89.47         | 0         | 0.00     | 0              | 0.00          | 3.46          | 9.11          |
| frostbite         | 65.2    | <b>454830</b>   | 9590.5     | 2.09          | 317.75    | 0.06     | 5083.5         | 1.10          | 1583          | 0.33          |
| gopher            | 257.6   | <b>355040</b>   | 70354.6    | 19.76         | 66782.3   | 18.75    | 114820.7       | 32.29         | 188680        | 53.11         |
| gravitar          | 173     | <b>162850</b>   | 1419.3     | 0.77          | 359.5     | 0.11     | 1106.2         | 0.57          | 4311          | 2.54          |
| hero              | 1027    | <b>1000000</b>  | 55887.4    | 5.49          | 33730.55  | 3.27     | 31628.7        | 3.06          | 24236         | 2.32          |
| ice hockey        | -11.2   | <b>36</b>       | 1.1        | 26.06         | 3.48      | 31.10    | 17.4           | 60.59         | 1.56          | 27.03         |
| jamesbond         | 29      | <b>45550</b>    | 19809      | 43.45         | 601.5     | 1.26     | 37999.8        | 83.41         | 12468         | 27.33         |
| kangaroo          | 52      | <b>1424600</b>  | 14637.5    | 1.02          | 1632      | 0.11     | 14308          | 1.00          | 5399          | 0.38          |
| krull             | 1598    | <b>104100</b>   | 8741.5     | 6.97          | 8147.4    | 6.39     | 9387.5         | 7.60          | 64347         | 61.22         |
| kung fu master    | 258.5   | <b>1000000</b>  | 52181      | 5.19          | 43375.5   | 4.31     | 607443         | 60.73         | 124630.1      | 12.44         |
| montezuma revenge | 0       | <b>1219200</b>  | 384        | 0.03          | 0         | 0.00     | 0.3            | 0.00          | 2488.4        | 0.20          |
| ms pacman         | 307.3   | <b>290090</b>   | 5380.4     | 1.75          | 7342.32   | 2.43     | 6565.5         | 2.16          | 7579          | 2.51          |
| name this game    | 2292.3  | 25220           | 13136      | 47.30         | 21537.2   | 83.94    | 26219.5        | 104.36        | <b>32098</b>  | <b>130.00</b> |
| phoenix           | 761.5   | <b>4014440</b>  | 108529     | 2.69          | 210996.45 | 5.24     | 519304         | 12.92         | 498590        | 12.40         |
| pitfall           | -229.4  | <b>114000</b>   | 0          | 0.20          | -1.66     | 0.20     | -0.6           | 0.20          | -17.8         | 0.19          |
| pong              | -20.7   | <b>21</b>       | 20.9       | 99.76         | 20.98     | 99.95    | <b>21</b>      | <b>100.00</b> | 20.39         | 98.54         |
| private eye       | 24.9    | <b>101800</b>   | 4234       | 4.14          | 98.5      | 0.07     | 96.3           | 0.07          | 134.1         | 0.11          |
| qbert             | 163.9   | <b>2400000</b>  | 33817.5    | 1.40          | 351200.12 | 14.63    | 21449.6        | 0.89          | 27371         | 1.13          |
| riverraid         | 1338.5  | <b>1000000</b>  | 22920.8    | 2.16          | 29608.05  | 2.83     | 40362.7        | 3.91          | 11182         | 0.99          |
| road runner       | 11.5    | <b>2038100</b>  | 62041      | 3.04          | 57121     | 2.80     | 45289          | 2.22          | 251360        | 12.33         |
| robotank          | 2.2     | <b>76</b>       | 61.4       | 80.22         | 12.96     | 14.58    | 62.1           | 81.17         | 10.44         | 11.17         |
| seaquest          | 68.4    | <b>999999</b>   | 15898.9    | 1.58          | 1753.2    | 0.17     | 2890.3         | 0.28          | 11862         | 1.18          |
| skiing            | -17098  | <b>-3272</b>    | -12957.8   | 29.95         | -10180.38 | 50.03    | -29968.4       | -93.09        | -12730        | 31.59         |
| solaris           | 1236.3  | <b>111420</b>   | 3560.3     | 2.11          | 2365      | 1.02     | 2273.5         | 0.94          | 2319          | 0.98          |
| space invaders    | 148     | <b>621535</b>   | 18789      | 3.00          | 43595.78  | 6.99     | 51037.4        | 8.19          | 3031          | 0.46          |
| star gunner       | 664     | 77400           | 127029     | 164.67        | 200625    | 200.00   | 321528         | 200.00        | <b>337150</b> | <b>200.00</b> |
| surround          | -10     | 9.6             | <b>9.7</b> | <b>100.51</b> | 7.56      | 89.59    | 8.4            | 93.88         | -10           | 0.00          |
| tennis            | -23.8   | <b>21</b>       | 0          | 53.13         | 0.55      | 54.35    | 12.2           | 80.36         | -21.05        | 6.14          |
| time pilot        | 3568    | 65300           | 12926      | 15.16         | 48481.5   | 72.76    | <b>105316</b>  | <b>164.82</b> | 84341         | 130.84        |
| tutankham         | 11.4    | <b>5384</b>     | 241        | 4.27          | 292.11    | 5.22     | 278.9          | 4.98          | 381           | 6.88          |
| up n down         | 533.4   | 82840           | 125755     | 152.14        | 332546.75 | 200.00   | 345727         | 200.00        | <b>416020</b> | <b>200.00</b> |
| venture           | 0       | <b>38900</b>    | 5.5        | 0.01          | 0         | 0.00     | 0              | 0.00          | 0             | 0.00          |
| video pinball     | 0       | <b>89218328</b> | 533936.5   | 0.60          | 572898.27 | 0.64     | 511835         | 0.57          | 297920        | 0.33          |
| wizard of wor     | 563.5   | <b>395300</b>   | 17862.5    | 4.38          | 9157.5    | 2.18     | 29059.3        | 7.22          | 26008         | 6.45          |
| yars revenge      | 3092.9  | <b>15000105</b> | 102557     | 0.66          | 84231.14  | 0.54     | 166292.3       | 1.09          | 118730        | 0.77          |
| zaxxon            | 32.5    | <b>83700</b>    | 22209.5    | 26.51         | 32935.5   | 39.33    | 41118          | 49.11         | 46070.8       | 55.03         |
| MEAN SABER(%)     | 0.00    | 100.00          |            | 28.39         |           | 29.45    |                | 36.78         |               | 36.10         |
| MEDIAN SABER(%)   | 0.00    | 100.00          |            | 4.92          |           | 4.31     |                | 8.08          |               | 10.29         |

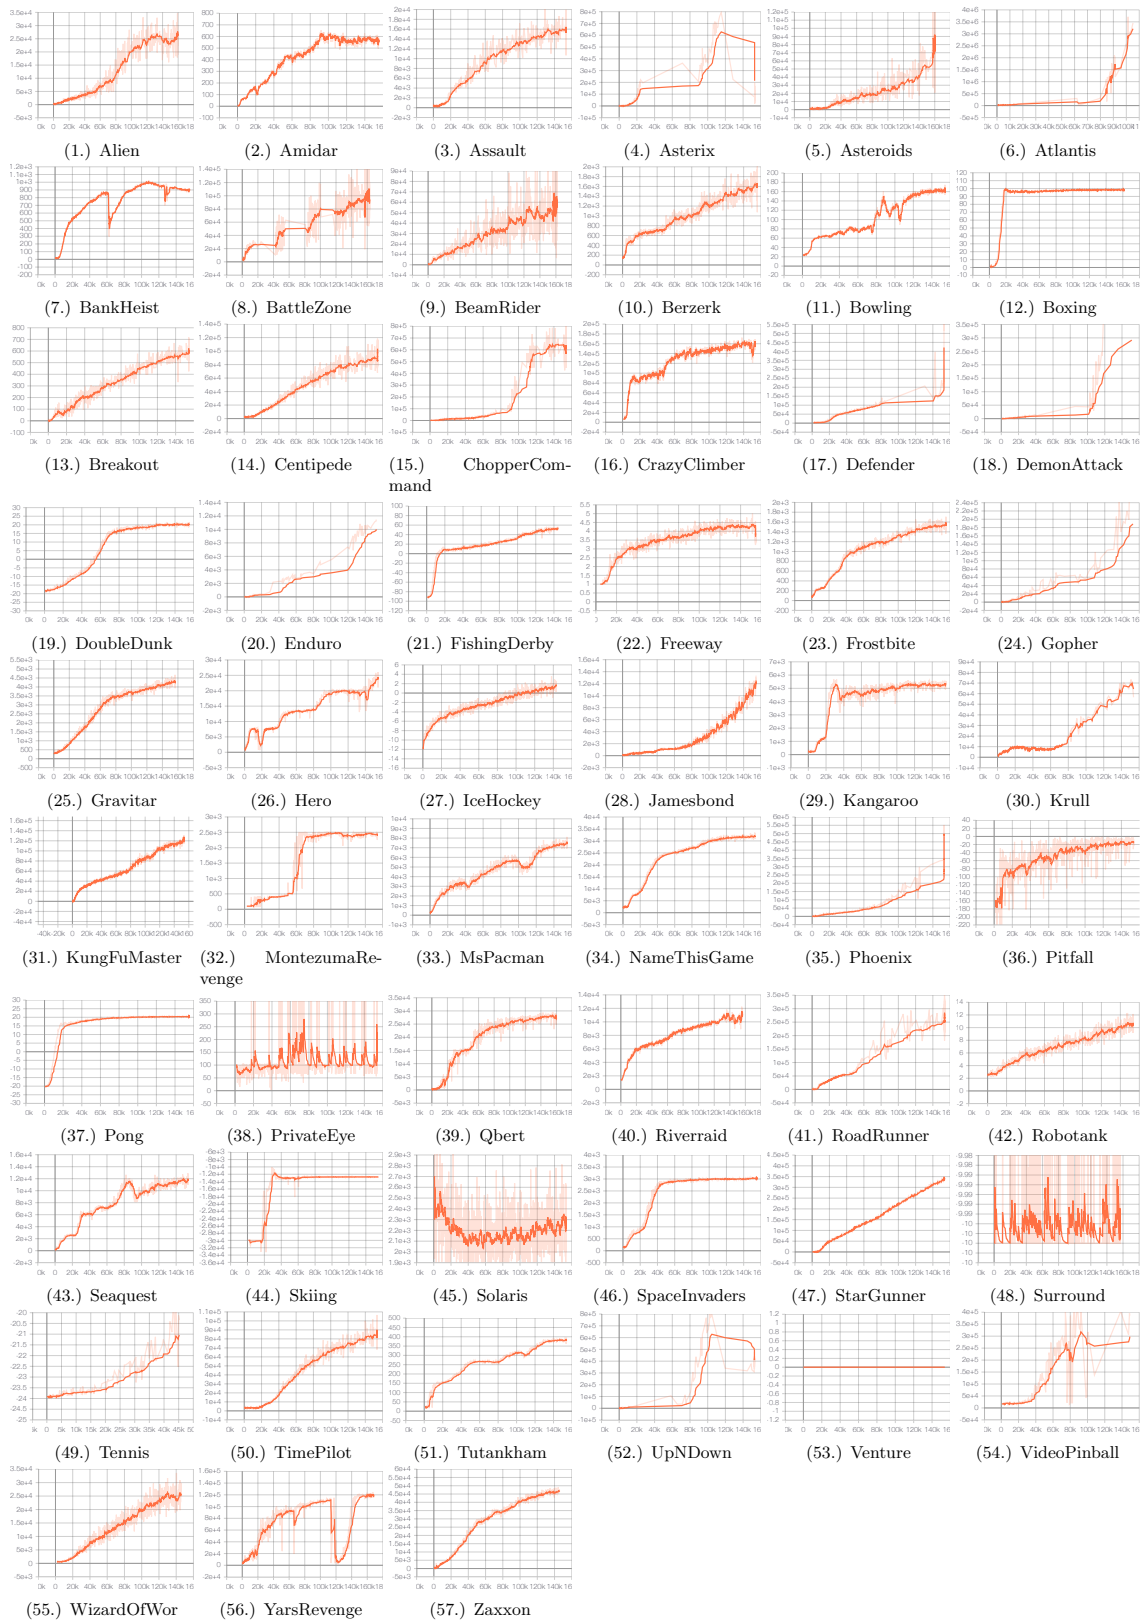

Supplement: supplementary_material [file attachment]
